# Supplementary material
Source: Springer Nature journal article supplement (https://www.springermedizin.de/resource/supplementary/13032_2014_86_MOESM4_ESM.pdf/9651594)

# Type A (non-displaced, stable)

**A1**

non-displaced  
glenoid fractures

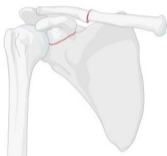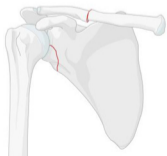

**A2**

non-displaced  
scapula body fractures

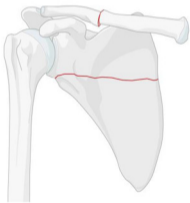

**A3**

non-displaced  
scapula neck/superior border

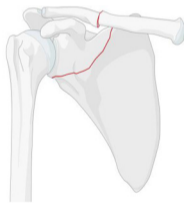

Supplement: MOESM4 [file 9651594]
